# 1 ***Drosophila attP40* background alters glomerular organization of the** 2 **olfactory receptor neuron terminals**

3 Qichen Duan<sup>1</sup>, Rachel Estrella<sup>1</sup>, Allison Carson<sup>1</sup>, Yang Chen<sup>1</sup>, Pelin C. Volkan<sup>1, #</sup>

4 <sup>1</sup>Department of Biology, Duke University, Durham, NC 27708

5 #Correspondence: [pelin.volkan@duke.edu](mailto:pelin.volkan@duke.edu)

## 6 7 **Abstract**

8 Bacteriophage integrase-directed insertion of transgenic constructs into specific  
9 genomic loci has been widely used by *Drosophila* community. A second chromosome-  
10 located *attP40* landing site gains popularity because of its high inducible expression  
11 levels of transgenes. Here, unexpectedly, we found that homozygous *attP40*  
12 chromosome leads to defects in the glomerular organization of *Drosophila* olfactory  
13 receptor neurons (ORNs). This effect is not likely to be caused by the loss of function of  
14 *Msp300*, where *attP40* docking site is inserted. Moreover, *attP40* site seems to  
15 genetically interact with a second chromosome *GAL4* driver, which also results in a  
16 similar ORN axon terminal defect. Though it remains elusive so far whether the ORN  
17 phenotype is caused by the neighboring genes around *Msp300* locus in the presence of  
18 *attP40*-based insertions or a second unknown mutation in the *attP40* background, our  
19 finding raises the critical issue with using this popular transgenic landing site. Rigorous  
20 controls are needed in the relevant experiments to rule out the *attP40*-associated  
21 background effects.

## 22 23 **Introduction**

24 RNA interference (RNAi)-based genetic screens provide scientists with powerful tools to  
25 identify genes involved in various biological processes (HOUSDEN *et al.* 2017). Binary  
26 expression systems, such as the *GAL4/UAS* system, induce the expression of various  
27 effectors in the desired cell populations (BRAND AND PERRIMON 1993). In *Drosophila*  
28 carrying transgenes for both cell-type-specific promoter-driven *GAL4* (driver) and *UAS-*  
29 *RNAi*, *GAL4* protein binds *UAS* sites and drives RNAi expression, disrupting the  
30 expression and function of the target gene (BRAND AND PERRIMON 1993). As RNAi-based  
31 knockdown methods were becoming popular, efforts were initiated to make transgenic  
32 libraries of flies carrying *UAS-RNAi* targeting all the genes in the genome (DIETZL *et al.*  
33 2007; NI *et al.* 2009; NI *et al.* 2011; PERKINS *et al.* 2015). These genome-wide libraries  
34 were then followed by efforts to generate thousands of *GAL4* lines that restrict  
35 expression to cellular subpopulations, enabling loss-of-function screens in cells of  
36 interest.

37 Among the RNAi collections, stocks from Transgenic RNAi Project (TRiP) have gained  
38 popularity because of their targeted integration of *UAS-RNAi* transgenes into the  
39 genome, efficient expression induced by appropriate *GAL4* drivers in different tissues,  
40 and high specificity with minimal expected off-target effects (MARKSTEIN *et al.* 2008; NI

41 *et al.* 2008; PERKINS *et al.* 2015). To expedite the generation of transgenic libraries, two  
42 predetermined chromosomal docking sites were targeted for recombination events that  
43 insert *UAS-RNAi* transgenes: *attP40* on the second chromosome and *attP2* on the third  
44 chromosome (MARKSTEIN *et al.* 2008). With the presence of bacteriophage-originated  
45 phiC31 integrase (by co-injection of integrase mRNA or germline-expressing transgenic  
46 integrase), the *UAS-RNAi* construct can be inserted into the corresponding docking  
47 sites (GROTH *et al.* 2004; NI *et al.* 2008). *AttP40* and *attP2* sites are selected because  
48 they exhibit optimal inducible expression levels upon binding with diverse tissue-specific  
49 *GAL4* drivers (MARKSTEIN *et al.* 2008). Therefore, in addition to the TRiP *UAS-RNAi*  
50 library, many other transgenes, including tissue-specific drivers (*GAL4*, *QF*, *LexA*) and  
51 *UAS/QUAS/LexAop-effectors/reporters* are also routinely integrated into these two  
52 landing sites (ZIRIN *et al.* 2020).

53 Given the widespread use of transgenic flies with *attP40* and *attP2* backbones, we must  
54 be more cognizant of possible genetic background effects during phenotypic analysis.  
55 Both *attP40* and *attP2* docking sites are in chromosomal regions populated by many  
56 genes. These sites, like any insertion into the genome, can disrupt function of nearby  
57 genes. More specifically, *attP40* site is located within one of the large introns of *Msp300*  
58 gene while *attP2* site is inserted in the 5' untranslated region (UTR) of *Mocs1* gene  
59 (LARKIN *et al.* 2020). Both *Msp300* and *Mocs1* have critical biological roles. Specifically,  
60 *Msp300* is the *Drosophila melanogaster* orthologue of mammalian Nesprins, which  
61 organize postsynaptic cytoskeleton scaffold and are required for stabilization of new  
62 synapses (ELHANANY-TAMIR *et al.* 2012; MOREL *et al.* 2014; TITLOW *et al.* 2020; ZHENG *et al.*  
63 2020). *Mocs1* is involved in Mo-molybdopterin cofactor biosynthetic process and  
64 inter-male aggressive behaviors (GAUDET *et al.* 2011; RAMIN *et al.* 2019). It is unclear  
65 how the insertion of various transgenic constructs into *attP40* and *attP2* docking sites  
66 would affect the function of these host genes which may further result in phenotypic  
67 defects.

68 Indeed, recent studies have raised issues related to landing site-associated effects. For  
69 example, van der Graaf *et al.* showed flies bearing two copies of *attP40*-derived  
70 insertions also show decreased *Msp300* transcript levels (VAN DER GRAAF *et al.* 2022). In  
71 addition, this study also reported defects in muscle nuclei spacing in larval stages in the  
72 *attP40* homozygous background, which phenocopies *Msp300* mutants (VAN DER GRAAF  
73 *et al.* 2022). These results suggest that *attP40* docking site and *attP40*-based  
74 transgenes are insertional mutations of *Msp300* gene (VAN DER GRAAF *et al.* 2022).  
75 Another study reported that *attP40* flies show resistance to cisplatin-induced neuronal  
76 damage, compared to *attP2* background (GROEN *et al.* 2022). This study tied the effect  
77 to the reduced *ND-13A* (NADH dehydrogenase 13 kDA subunit, a component of  
78 mitochondrial complex I) expression in *attP40* homozygous flies (GROEN *et al.* 2022). It  
79 is noteworthy that *ND-13A* flanks the 5' UTR of *Msp300* and is downstream of *attP40*  
80 docking site. Together, these results imply the integration of *attP40* docking site  
81 significantly changes the local transcriptional state and interferes with the transcription  
82 of surrounding genes.

83 During a *GAL4*-driven *UAS-RNAi* screen for olfactory neuron axon organization, we  
84 observed an axon terminal phenotype that is associated with *attP40* background. The  
85 phenotype occurs in the flies homozygous for *attP40* docking site alone or with various

86 transgenic insertions, independent of the identity of the transgene. Notably, the  
87 phenotype observed in *attP40* background appears to be recessive but is independent  
88 of *Msp300* function, possibly implicating other *attP40* background mutations nearby or  
89 in other locations on the second chromosome. Though the nature of the mutation is  
90 unclear, the background effects should be mitigated by designing more rigorous  
91 controls to interpret phenotypic data obtained using reagents in concert with *attP40*  
92 backgrounds.

93

## 94 **Materials and methods**

### 95 ***Drosophila* stocks and genetics**

96 *Drosophila* were raised in classic molasses media provided by Archon Scientific. For the  
97 RNAi screen experiments, flies were raised at 28 °C to maximize the knockdown  
98 efficiency. Most of the other crosses were also kept at 28 °C, except for the experiments  
99 shown in Figure 1F, which were conducted at room temperature (23 °C). After eclosion,  
100 the flies are aged for 5-7 days before dissection. In addition to the *UAS-RNAi* stocks  
101 from Bloomington *Drosophila* Stock Center (listed in Figure 1B), the following stocks are  
102 used: *UAS-RFP RNAi attP2* (BDSC# 35785), *UAS-beat-1a RNAi* GD1386 (VDRC#  
103 4544), *attP40* (BDSC# 36304), *attP2* (BDSC# 36303), *ctrl-gRNA attP40* (BDSC#  
104 67539), *UAS-RFP attP40* (BDSC# 32222), *Msp300<sup>deltaKASH</sup>* (BDSC# 26781),  
105 *Msp300<sup>MI01145</sup>* (BDSC# 53050), *Msp300<sup>MI00111</sup>* (BDSC# 30623), *Msp300<sup>KG03631</sup>* (BDSC#  
106 13024); *Or47b-GAL4* (chr2), *Or47b-GAL4* (chr3), *Or43a-GAL4* (chr2), *Or47a-GAL4*  
107 (chr2) (VOSSHALL *et al.* 2000; FISHILEVICH AND VOSSHALL 2005), and *Gr21a-GAL4* (chr2)  
108 (SCOTT *et al.* 2001)) are gifts from Dr. Leslie Vosshall; *UAS-SytGFP* (chr2 or chr3) is a  
109 Volkan lab stock (BARISH *et al.* 2018). The line *Or47b-GAL4*, *Or47a-GAL4*, *Or43a-*  
110 *GAL4*, *Gr21a-GAL4*, *UAS-SytGFP/CyO* was recombined and balanced from the above  
111 components.

112

### 113 **Immunocytochemistry**

114 Flies were sacrificed in 70% ethanol. Fly brains were then dissected in PBST buffer  
115 (0.2% Triton X-100 in 1X PBS), fixed in 4% paraformaldehyde for 30 mins, followed by  
116 washing with PBST for three 10-min cycles. Brains were incubated in the primary  
117 antibody mix at 4 °C overnight, followed by three 20-min washes with PBST at room  
118 temperature, then incubated in the secondary antibody mix at 4 °C overnight. The  
119 brains were washed again by three 20-min wash with PBST before being mounted on  
120 the slide for imaging. The blocking was done together with each antibody incubation,  
121 with 1% natural goat serum mixed with primary and secondary antibodies, respectively.  
122 The following primary antibodies were used: 1:1000 rabbit anti-GFP (Invitrogen), 1:20  
123 rat anti-Ncad (DSHB); the following secondary antibodies were used: 1:1000 Alexa  
124 Fluor 488 goat anti-rabbit IgG (Invitrogen), 1:200 Alexa Fluor 647 goat anti-rat IgG  
125 (Invitrogen); all antibodies are diluted in PBST.

126

## 127 **Confocal imaging and phenotypic quantification**

128 Confocal imaging was performed by either Olympus Fluoview FV1000 microscope or  
129 Zeiss 880 microscope. Brains were imaged across Z-axis from the posterior side to the  
130 most anterior side of the antennal lobes, and all confocal sections were overlaid for  
131 phenotypical analysis. The same set of imaging parameters was used between  
132 experimental and control groups. The phenotype was qualitatively determined by  
133 glomerular morphology, i.e., whether Or47b ORN axons appear in the dorsal antennal  
134 lobe region, in contrast to the typical V-shaped glomerulus in wild-type controls. The  
135 phenotype shown in Figure 1 (glomerular expansion) is largely consistent from brain to  
136 brain, while the phenotypes shown in Figure 2B,E exhibit variability, which were  
137 categorized into expansion or dorsal shift. The phenotype was quantified by the  
138 percentage of antennal lobes exhibiting each defect among all the brains examined in  
139 respective groups. P-value was calculated by two-tailed Fisher's exact test through the  
140 built-in functions of GraphPad Prism 9 software.

141

## 142 **Results**

143 We used the *Drosophila* olfactory receptor neurons (ORNs) as a model to understand  
144 the molecular mechanisms underlying neuronal circuit assembly. In *Drosophila*, each  
145 class of ORNs expresses a unique olfactory receptor (*Or*) gene, and ORN axons target  
146 to the brain antennal lobe within class-specific and uniquely positioned synaptic units  
147 called glomeruli (HONG AND LUO 2014; BARISH AND VOLKAN 2015). To identify the  
148 molecular players contributing to the glomerular organization of the ORNs, we  
149 genetically screened genes encoding cell adhesion molecules whose expression levels  
150 increase over pupal development in the antennae (BARISH *et al.* 2018). Among these,  
151 *beat* and *side* gene families drew our attention because they encode the Ig superfamily  
152 proteins, form a heterophilic interacting protein network, and have been previously  
153 revealed to be involved in neuronal adhesion (FAMBROUGH AND GOODMAN 1996; PIPES *et*  
154 *al.* 2001; SINK *et al.* 2001; DE JONG *et al.* 2005; SIEBERT *et al.* 2009; ÖZKAN *et al.* 2013; LI  
155 *et al.* 2017; KINOLD *et al.* 2021). We obtained a collection of transgenic *UAS-RNAi* lines  
156 from TRiP library deposited at the Bloomington *Drosophila* Stock Center (BDSC) and  
157 crossed these lines with an established recombinant chromosome containing four  
158 different *Or* promoter-driven *GAL4* transgenes (*Or47a-GAL4*, *Or47b-GAL4*, *Or23a-*  
159 *GAL4*, *Gr21a-GAL4*) together with a *UAS-SytGFP* reporter. We examined the  
160 knockdown effect of candidate genes on axonal targeting of these four ORN classes.  
161 The parent flies with a single copy of the *GAL4* drivers showed wild type glomerular  
162 organization (Figure 1A). As an additional control, we also crossed *GAL4* driver lines to  
163 flies expressing the RNAi against a red fluorescent protein (RFP) mCherry, which also  
164 exhibited no apparent defect in glomerular organization (Figure 1A).

165 From the screen, we found a strikingly recurrent phenotype, where the axon terminals of  
166 Or47b ORNs invade the neighboring region, leading to an expanded round VA1v  
167 glomerulus in contrast to the crescent shape in control brains (Figure 1A). This  
168 phenotype was observed in two independent RNAi lines targeting the same gene, for  
169 example, *beat-la* (Figure 1A). However, screening a list of *beat* and *side* family



170 members revealed a pattern for the phenotype, which only correlated with the second  
171 chromosome *UAS-RNAi* transgenes, independent of the gene identity. Figure 1B  
172 summarizes the screening results from *beat/side* gene families. All the RNAi lines  
173 inserted at the second chromosome *attP40* site yielded the expanded VA1v glomerulus  
174 phenotype, whereas none of the RNAi lines inserted at the third chromosome *attP2* site  
175 showed this defect. Notably, there is one gene, *beat-IIIc*, with one *attP40*-derived RNAi  
176 line and one *attP2*-derived RNAi line. Only the *attP40* *UAS-RNAi* insertion gave rise to  
177 the phenotype (Figure 1B). The same phenotype was also observed with randomly  
178 selected TRiP *UAS-RNAi* lines inserted at the *attP40* site targeting genes without known  
179 roles in ORN development (data not shown). To test whether this phenotype is caused  
180 by specific effects of RNAi-mediated gene knockdown or simply by the presence of  
181 *attP40*-derived insertions, we first crossed the same *Or47b-GAL4* driver line to a third  
182 GD *UAS-RNAi* line from Vienna Drosophila Resource Center (VDRC) targeting *beat-Ia*,  
183 which was generated by random P-element mediated insertions (DIETZL *et al.* 2007).  
184 The GD *UAS-RNAi* line could not reproduce the phenotype obtained by the *attP40*-  
185 derived *UAS-RNAi* from the TRiP collection (Figure 1C). In addition, crossing the driver  
186 line to an empty *attP40* site without any transgenes led to the same glomerular  
187 expansion phenotype (Figure 1D). These results suggest that the *Or47b* ORN-specific  
188 VA1v glomerular defect is independent of the RNAi-based knockdown of the genes  
189 examined but caused by an effect from the *attP40*-derived chromosome.

190 Since we repeatedly obtained the VA1v glomerular phenotype with the second  
191 chromosome *Or47b-GAL4*-driven *UAS-RNAi*, we also tested if crossing flies carrying  
192 the same *Or47b-GAL4* transgene to various *attP40* derivatives could result in the same  
193 phenotype (Figure 1E). Compared with the no *attP40* control (over a *CyO* balancer  
194 chromosome), the *attP40* landing site with and without *UAS-RNAi* insertion, *UAS-RFP*,  
195 or a ubiquitous promoter-driven gRNA targeting the *QUAS* sequence (control gRNA) all  
196 produced the same VA1v glomerular defect when crossed to the second chromosome  
197 *Or47b-GAL4*-driven *UAS-SytGFP* (Figure 1F). This phenotype is not due to the  
198 dominant effect of *attP40* or *attP40* derivatives, as animals with a single copy of *attP40*-  
199 derived insertion with a third chromosome-located *Or47b-GAL4* driver appeared wild  
200 type (Figure 1G,H). Only the combination of the second chromosome *Or47b-GAL4* over  
201 the *attP40* docking site or *attP40* derivatives yielded the glomerular targeting defects.  
202 This result suggests that *attP40* chromosome genetically interacts with the second  
203 chromosome *Or47b-GAL4* driver background to generate the VA1v glomerular defect.

204 Surprisingly, homozygous *attP40* derivatives or *attP40* empty docking site alone could  
205 produce similar axon terminal defects when a third chromosome *Or47b-GAL4 UAS-*  
206 *sytGFP* transgenes were used. Flies heterozygous for *attP40* site with or without  
207 transgenes appeared wild type (Figure 2A-F). Most of the brains in flies homozygous for  
208 *attP40* site with or without insertions displayed a dorsally positioned VA1v glomerulus  
209 (Figure 2B,E, middle panels; Figure 2C,F), whereas a small proportion also exhibited an  
210 expanded glomerulus (Figure 2B,E, right panels; Figure 2C,F). Given that *attP40* site is  
211 located within an intron of *Msp300* gene, we posited that it likely disrupts *Msp300*  
212 function. *Msp300* encodes a Nesprin-like protein, which is required for proper  
213 positioning of muscle nuclei and neuromuscular junction formation (ELHANANY-TAMIR *et*  
214 *al.* 2012; MOREL *et al.* 2014). Single-cell RNA-seq datasets from ORNs also show broad

215 expression of *Msp300* across ORN classes (Li *et al.* 2022). We thus tested if the VA1v  
 216 glomerular defect is caused by the loss of *Msp300* function. We analyzed  
 217 transheterozygotes of empty *attP40* docking site over other mutant alleles of *Msp300*,  
 218 such as *Msp300<sup>deltaKASH</sup>* (which lacks the KASH domain (XIE AND FISCHER 2008;  
 219 ELHANANY-TAMIR *et al.* 2012)), *Msp300<sup>MI00111</sup>*, *Msp300<sup>MI01145</sup>* (two MIMIC-based alleles  
 220 predicted to disrupt most splice isoforms of *Msp300* transcripts (VENKEN *et al.* 2011)),  
 221 and *Msp300<sup>KG03631</sup>* (a P-element-based insertion which is close to *attP40* landing site  
 222 (BELLEN *et al.* 2004)) (Figure 2G). However, none of these genetic combinations  
 223 produced the same VA1v glomerular phenotype (Figure 2H). This indicates that the  
 224 VA1v glomerular defect is independent of the *Msp300* function and is likely caused by a  
 225 second recessive mutation linked to the *attP40* docking site.

226

## Figure 1

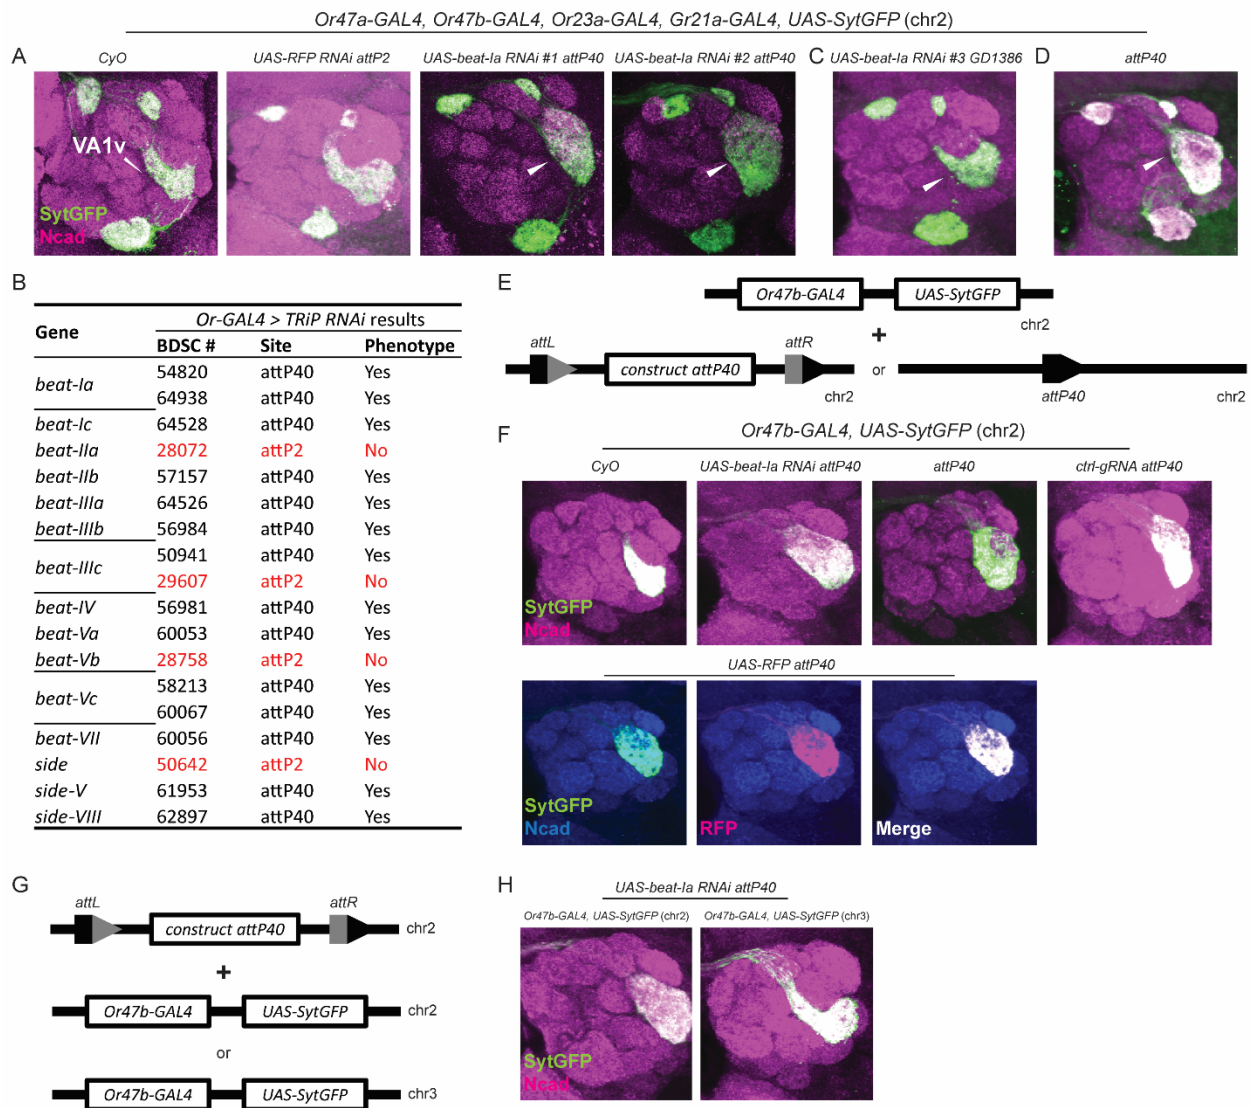

227

228 **Figure 1. *Drosophila attP40* site genetically interacts with a second chromosome**  
229 ***Or47b-GAL4* background resulting in glomerular defects.** (A, C & D) Confocal  
230 images of representative brains from a genetic screen to identify adhesion molecules  
231 involved in the glomerular organization of the *Drosophila* olfactory receptor neuron axon  
232 terminals. We crossed a second chromosome containing four different *Drosophila*  
233 olfactory receptor promoter-driven *GAL4s* (*Or47a-*, *Or47b-*, *Or23a-*, *Gr21a-*) together  
234 with a *UAS-SytGFP* reporter to the indicated *UAS-RNAi* lines or *attP40* background  
235 flies. The parental driver chromosome over the *CyO* balancer was used as a no-RNAi  
236 control. The invading *Or47b* ORN axons are denoted with white arrowheads. (B)  
237 Summary of the phenotypical results from the genetic screen focusing on *beat/side*  
238 gene families. The Bloomington stock number and the transgenic docking site of each  
239 line are also listed. (E, F) Schematic in (E) shows the genotype of animals used in (F),  
240 where each fly has one copy of the second chromosome carrying an *Or47b-GAL4* driver  
241 and a *UAS-SytGFP* reporter, and one copy of the indicated second chromosome, either  
242 a *CyO* balancer or *attP40* docking site derivatives. *attL* and *attR* sites are generated as  
243 a result of transgene integration into *attP40* docking site. Confocal images of  
244 representative brains are shown in F. (G, H) Schematic in G shows the genotype of  
245 animals used in (H), where each fly has one copy of the second chromosome *UAS-*  
246 *beat-la RNAi* transgene inserted into the *attP40* docking site, with *Or47b-GAL4* driver  
247 and a *UAS-SytGFP* reporter, either on the second or third chromosome. Confocal  
248 images of representative brains are shown in (H). 10~25 brains were examined in each  
249 genotype and the phenotypical penetrance is almost 100% in each condition.

250



## Figure 2

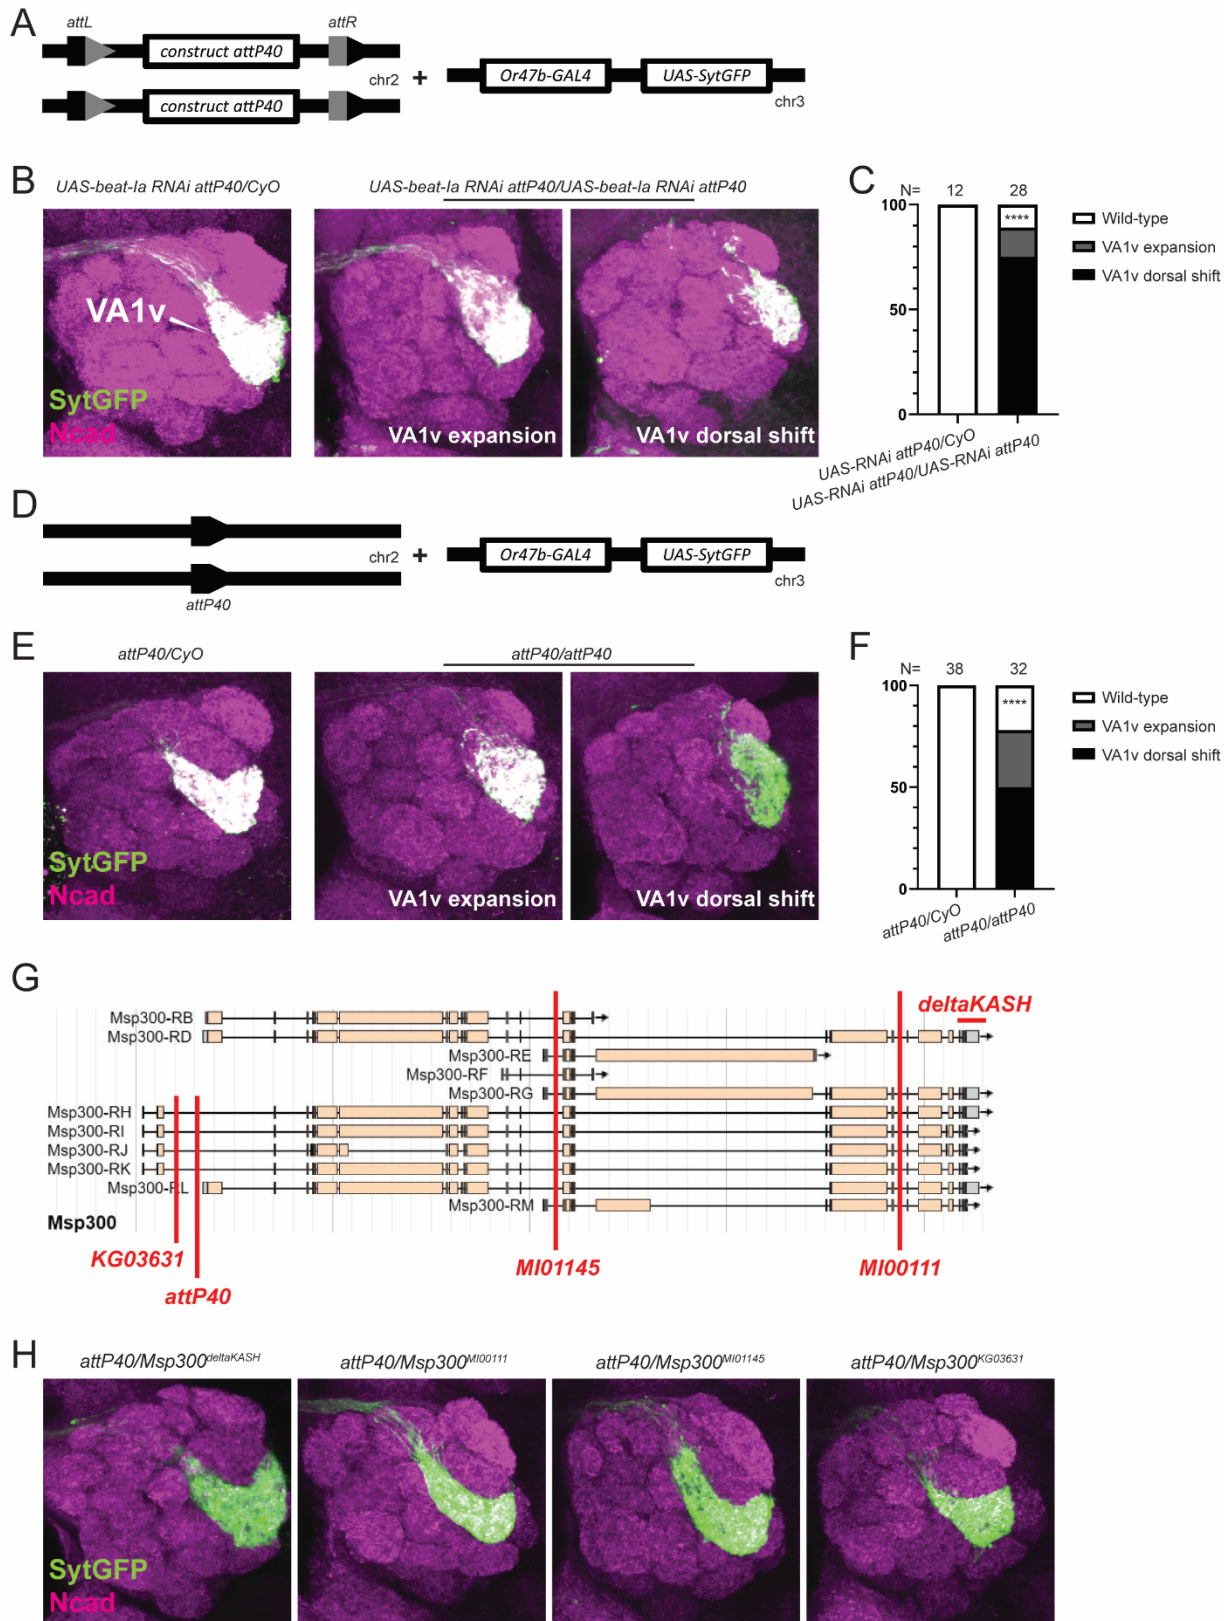



252 **Figure 2. Homozygous *attP40* chromosome affects glomerular organization**  
253 **independent of the *Msp300* function.** (A-C) Schematic in (A) shows the genotype of  
254 animals used in (B), where each fly has one or two copies of the second chromosome  
255 *UAS-beat-la RNAi* transgene inserted at the *attP40* docking site, with the third  
256 chromosome *Or47b-GAL4 UAS-SytGFP* transgenes. Confocal images of representative  
257 brains are shown in (B). The percentage of the phenotypes is shown in (C). \*\*\*\*,  
258  $p < 0.0001$  after Fisher's exact test. (D-F) Schematic in (D) shows the genotype of  
259 animals used in (E), where each fly has one or two copies of the second chromosome  
260 empty *attP40* docking site, with the third chromosome *Or47b-GAL4 UAS-SytGFP*  
261 transgenes. Confocal images of representative brains are shown in (D). The percentage  
262 of the phenotypes is shown in (F). \*\*\*\*,  $p < 0.0001$  after Fisher's exact test. N in (C) and  
263 (F) denotes the antennal lobes examined. (G) Schematic showing the *Msp300* genomic  
264 locus, the *attP40* docking site, three insertional *Msp300* mutations (*Msp300*<sup>M100111</sup>,  
265 *Msp300*<sup>M101145</sup>, *Msp300*<sup>KG03631</sup>), and one deletion allele (*Msp300*<sup>deltaKASH</sup>), each denoted  
266 with red lines. (H) Confocal images of representative brains of the indicated  
267 transheterozygous animals, with *attP40* docking site over the indicated *Msp300* alleles.  
268 N = 11, 8, 4, 12 brains in each genotype group, from left to right.

269

## 270 Discussion

271 Here, we found that homozygous *attP40* chromosome leads to defective glomerular  
272 organization of ORNs. This defect is likely not caused by the loss of *Msp300* function,  
273 where *attP40* site is inserted. Moreover, *attP40* site genetically interacts with a second  
274 chromosome carrying the *Or47b-GAL4* transgene, resulting in a similar ORN axon  
275 terminal defect. Though the exact genetic reasons and molecular mechanisms are  
276 unknown, our finding raises the critical issue with using this popular transgene landing  
277 site. Rigorous controls are needed to rule out the *attP40*-associated background effects.

278 A recent study reported that flies homozygous for *attP40*-derived insertions had 50%  
279 reduction in *Msp300* transcript levels and phenocopied the defects in larval muscle  
280 nuclei clustering in *Msp300* mutants (VAN DER GRAAF *et al.* 2022). As homozygotes of  
281 the *attP40* chromosome are defective in *Or47b* ORN axon terminal organization, we  
282 hypothesized that the *attP40*-affected *Msp300* gene is responsible for the defect.  
283 However, this is not the case as *attP40* over various *Msp300* mutations appeared  
284 phenotypically wild type, suggesting *attP40* chromosome may carry an unannotated  
285 mutation. Further support for this comes from the normal *Msp300* transcript levels in  
286 flies homozygous for empty *attP40* docking site despite exhibiting defective muscle  
287 nuclei spacing (VAN DER GRAAF *et al.* 2022). Thus, it is possible that *attP40* docking site  
288 generates either a weak hypomorphic mutation in *Msp300* that does not drastically alter  
289 transcript levels, or that the observed nuclei phenotype in *attP40* homozygotes is  
290 independent of *Msp300*. Additional loss-of-function or rescue experiments are needed  
291 to distinguish between these possibilities.

292 The *attP40* docking site with or without transgene insertions may also disrupt other  
293 genes in the vicinity of *Msp300*. For example, in addition to *Msp300*, *attP40* docking site  
294 is flanked on the opposing side by *ND-13A*, which encodes a component of the

295 mitochondria electron transport chain complex I. Thus, *attP40* docking site alone or  
296 transgene insertions may lead to a variety of phenotypes as a result of disrupted *ND-*  
297 *13A*. Indeed, Groen et al. reported that *attP40* flies exhibit resistance to cisplatin-  
298 induced neuronal damage mediated by the reduced expression of *ND-13A* (GROEN *et*  
299 *al.* 2022). Whether the glomerular defect is dependent on the *ND-13A* function is  
300 beyond the scope of this paper but needs to be test in the future studies.

301 Surprisingly, we found transheterozygous animals with an *attP40* chromosome over the  
302 second chromosome *Or47b-GAL4* transgene produced similar glomerular  
303 abnormalities. This suggests that the second chromosome bearing *Or47b-GAL4* driver  
304 may carry similar background mutations as the *attP40* chromosome. Nevertheless,  
305 since the *Or47b-GAL4/attP40* phenotype is not qualitatively identical to the  
306 *attP40/attP40* one, another possibility is that these two chromosomes possess alleles of  
307 two different genes that interact with each other in the same genetic pathway.

308 To summarize, we found unexpected background effects of *Drosophila attP40* landing  
309 site on the ORN glomerular organization. In parallel with other recent studies reporting  
310 other phenotypes arising from the *attP40* background, ranging from muscle  
311 development to neuronal stress responses, such background effects should be  
312 seriously considered in using *attP40*-derived flies. It is recommended to avoid using  
313 homozygotes/double-copies of the *attP40*-based insertions. Researchers should also be  
314 aware of the potential genetic interactions between the *attP40*-bearing chromosome  
315 and the other homologous second chromosomes even if it doesn't contain any *attP40*  
316 derivatives. Appropriate controls should be applied to override these caveats. For  
317 example, when working with *GAL4/UAS-effector* binary system, it is better to use a  
318 *GAL4*-driven *UAS-neutral effector* (such as a scrambled RNAi inserted at the same  
319 docking site) as a negative control, rather than the widespread use of *GAL4* alone or  
320 *UAS-effector* alone controls. Transgenic rescue of RNAi-based gene knockdowns is not  
321 feasible due to targeting of rescue transgenes by the RNAi. Thus, use of full animal  
322 mutants or MARCM based clonal mutant analysis should be coupled with RNAi-based  
323 phenotypic analyses. Though the underlying genetic reasons remain elusive, studies  
324 demonstrated that the *attP40* landing site on chromosome II affects the expression of  
325 multiple genes (GROEN *et al.* 2022; VAN DER GRAAF *et al.* 2022). Additional omics-based  
326 experiments in the future will be needed to determine all the genetic lesions in the  
327 *attP40* strain that underly many phenotypic defects observed in this background. These  
328 studies will also reveal potential genetic alterations associated with glomerular defects,  
329 providing new insights into ORN axon pathfinding and glomerular organization.

330

## 331 **Data availability**

332 The authors affirm that all the data necessary for drawing the conclusions are present in  
333 the text, figures, and figure legends. Most of the *Drosophila* stocks are obtained from  
334 Bloomington or Vienna stock center, with identifiers listed in the materials and methods  
335 section. All the other lines are available upon request.

336

## 337 **Acknowledgments**

338 We would like to thank Bloomington Drosophila Stock Center and Vienna Drosophila  
339 Resource Center for providing all the fly stocks. We thank Duke Light Microscopy Core  
340 Facility for help with imaging.

## 341 **Funding**

342 This study is funded by grant NSF 2006471 and NIH 5R01NS109401 (both to P.C.V.).  
343 Q.D. is supported by Duke Biology Department Ph.D. program.

## 344 **Conflicts of interest**

345 The authors declare no conflict of interest with the contents of this paper.

346

## 347 **Author contribution**

348 Q.D. and P.C.V. conceived the study and designed the experiments; Q.D. did most of  
349 the experiments with help from R.E., A.C., and Y.C.; Q.D. analyzed the data and  
350 prepared the figures; Q.D. and P.C.V. wrote and edited the manuscript.

351

## 352 **References**

- 353 Barish, S., S. Nuss, I. Strunilin, S. Bao, S. Mukherjee *et al.*, 2018 Combinations of DIPs and Dprs control  
354 organization of olfactory receptor neuron terminals in *Drosophila*. *PLoS Genet* 14: e1007560.
- 355 Barish, S., and P. C. Volkan, 2015 Mechanisms of olfactory receptor neuron specification in *Drosophila*.  
356 *Wiley Interdiscip Rev Dev Biol* 4: 609-621.
- 357 Bellen, H. J., R. W. Levis, G. Liao, Y. He, J. W. Carlson *et al.*, 2004 The BDGP Gene Disruption Project:  
358 Single Transposon Insertions Associated With 40% of *Drosophila* Genes. *Genetics* 167: 761-781.
- 359 Brand, A. H., and N. Perrimon, 1993 Targeted gene expression as a means of altering cell fates and  
360 generating dominant phenotypes. *Development* 118: 401-415.
- 361 de Jong, S., J. A. Cavallo, C. D. Rios, H. A. Dworak and H. Sink, 2005 Target recognition and  
362 synaptogenesis by motor axons: responses to the sidestep protein. *Int J Dev Neurosci* 23: 397-  
363 410.
- 364 Dietzl, G., D. Chen, F. Schnorrer, K.-C. Su, Y. Barinova *et al.*, 2007 A genome-wide transgenic RNAi library  
365 for conditional gene inactivation in *Drosophila*. *Nature* 448: 151-156.
- 366 Elhanany-Tamir, H., Y. X. V. Yu, M. Shnayder, A. Jain, M. Welte *et al.*, 2012 Organelle positioning in  
367 muscles requires cooperation between two KASH proteins and microtubules. *Journal of Cell*  
368 *Biology* 198: 833-846.
- 369 Fambrough, D., and C. S. Goodman, 1996 The *Drosophila* beaten path gene encodes a novel secreted  
370 protein that regulates defasciculation at motor axon choice points. *Cell* 87: 1049-1058.
- 371 Fishilevich, E., and L. B. Vosshall, 2005 Genetic and functional subdivision of the *Drosophila* antennal  
372 lobe. *Curr Biol* 15: 1548-1553.
- 373 Gaudet, P., M. S. Livstone, S. E. Lewis and P. D. Thomas, 2011 Phylogenetic-based propagation of  
374 functional annotations within the Gene Ontology consortium. *Brief Bioinform* 12: 449-462.

- 375 Groen, C. M., J. L. Podratz, J. Pathoulas, N. Staff and A. J. Windebank, 2022 Genetic Reduction of  
376 Mitochondria Complex I Subunits is Protective against Cisplatin-Induced Neurotoxicity in  
377 *Drosophila*. *Journal of Neuroscience* 42: 922-937.
- 378 Groth, A. C., M. Fish, R. Nusse and M. P. Calos, 2004 Construction of transgenic *Drosophila* by using the  
379 site-specific integrase from phage  $\phi$ C31. *Genetics* 166: 1775-1782.
- 380 Hong, W., and L. Luo, 2014 Genetic control of wiring specificity in the fly olfactory system. *Genetics* 196:  
381 17-29.
- 382 Housden, B. E., M. Muhar, M. Gemberling, C. A. Gersbach, D. Y. Stainier *et al.*, 2017 Loss-of-function  
383 genetic tools for animal models: cross-species and cross-platform differences. *Nature Reviews*  
384 *Genetics* 18: 24-40.
- 385 Kinold, J. C., M. Brenner and H. Aberle, 2021 Misregulation of *Drosophila* Sidestep Leads to Uncontrolled  
386 Wiring of the Adult Neuromuscular System and Severe Locomotion Defects. *Front Neural*  
387 *Circuits* 15: 658791.
- 388 Larkin, A., S. J. Marygold, G. Antonazzo, H. Attrill, G. dos Santos *et al.*, 2020 FlyBase: updates to the  
389 *Drosophila melanogaster* knowledge base. *Nucleic Acids Research* 49: D899-D907.
- 390 Li, H., J. Janssens, M. De Waegeneer, S. S. Kolluru, K. Davie *et al.*, 2022 Fly Cell Atlas: A single-nucleus  
391 transcriptomic atlas of the adult fruit fly. *Science* 375: eabk2432.
- 392 Li, H., A. Watson, A. Olechwier, M. Anaya, S. K. Sorooshyari *et al.*, 2017 Deconstruction of the beaten  
393 Path-Sidestep interaction network provides insights into neuromuscular system development.  
394 *Elife* 6.
- 395 Markstein, M., C. Pitsouli, C. Villalta, S. E. Celniker and N. Perrimon, 2008 Exploiting position effects and  
396 the gypsy retrovirus insulator to engineer precisely expressed transgenes. *Nature genetics* 40:  
397 476-483.
- 398 Morel, V., S. Lepicard, A. N Rey, M.-L. Parmentier and L. Schaeffer, 2014 *Drosophila* Nesprin-1 controls  
399 glutamate receptor density at neuromuscular junctions. *Cellular and molecular life sciences* 71:  
400 3363-3379.
- 401 Ni, J.-Q., L.-P. Liu, R. Binari, R. Hardy, H.-S. Shim *et al.*, 2009 A *Drosophila* resource of transgenic RNAi  
402 lines for neurogenetics. *Genetics* 182: 1089-1100.
- 403 Ni, J.-Q., M. Markstein, R. Binari, B. Pfeiffer, L.-P. Liu *et al.*, 2008 Vector and parameters for targeted  
404 transgenic RNA interference in *Drosophila melanogaster*. *Nature methods* 5: 49-51.
- 405 Ni, J.-Q., R. Zhou, B. Czech, L.-P. Liu, L. Holderbaum *et al.*, 2011 A genome-scale shRNA resource for  
406 transgenic RNAi in *Drosophila*. *Nature methods* 8: 405-407.
- 407 Özkan, E., R. A. Carrillo, C. L. Eastman, R. Weiszmann, D. Waghay *et al.*, 2013 An extracellular  
408 interactome of immunoglobulin and LRR proteins reveals receptor-ligand networks. *Cell* 154:  
409 228-239.
- 410 Perkins, L. A., L. Holderbaum, R. Tao, Y. Hu, R. Sopko *et al.*, 2015 The transgenic RNAi project at Harvard  
411 Medical School: resources and validation. *Genetics* 201: 843-852.
- 412 Pipes, G. C., Q. Lin, S. E. Riley and C. S. Goodman, 2001 The Beat generation: a multigene family  
413 encoding IgSF proteins related to the Beat axon guidance molecule in *Drosophila*. *Development*  
414 128: 4545-4552.
- 415 Ramin, M., Y. Li, W. T. Chang, H. Shaw and Y. Rao, 2019 The peacefulness gene promotes aggression in  
416 *Drosophila*. *Mol Brain* 12: 1.
- 417 Scott, K., R. Brady, Jr., A. Cravchik, P. Morozov, A. Rzhetsky *et al.*, 2001 A chemosensory gene family  
418 encoding candidate gustatory and olfactory receptors in *Drosophila*. *Cell* 104: 661-673.
- 419 Siebert, M., D. Banovic, B. Goellner and H. Aberle, 2009 *Drosophila* motor axons recognize and follow a  
420 Sidestep-labeled substrate pathway to reach their target fields. *Genes Dev* 23: 1052-1062.
- 421 Sink, H., E. J. Rehm, L. Richstone, Y. M. Bulls and C. S. Goodman, 2001 sidestep encodes a target-derived  
422 attractant essential for motor axon guidance in *Drosophila*. *Cell* 105: 57-67.



- 423 Titlow, J., F. Robertson, A. Järvelin, D. Ish-Horowicz, C. Smith *et al.*, 2020 Syncrip/hnRNP Q is required for  
424 activity-induced Msp300/Nesprin-1 expression and new synapse formation. *Journal of Cell*  
425 *Biology* 219.
- 426 van der Graaf, K., S. Srivastav, P. Singh, J. A. McNew and M. Stern, 2022 The *Drosophila* attP40 docking  
427 site and derivatives are insertion mutations of MSP300. *bioRxiv*.
- 428 Venken, K. J., K. L. Schulze, N. A. Haelterman, H. Pan, Y. He *et al.*, 2011 MiMIC: a highly versatile  
429 transposon insertion resource for engineering *Drosophila melanogaster* genes. *Nat Methods* 8:  
430 737-743.
- 431 Vosshall, L. B., A. M. Wong and R. Axel, 2000 An olfactory sensory map in the fly brain. *Cell* 102: 147-159.
- 432 Xie, X., and J. A. Fischer, 2008 On the roles of the *Drosophila* KASH domain proteins Msp-300 and  
433 Klarsicht. *Fly* 2: 74-81.
- 434 Zheng, Y., R. A. Buchwalter, C. Zheng, E. M. Wight, J. V. Chen *et al.*, 2020 A perinuclear microtubule-  
435 organizing centre controls nuclear positioning and basement membrane secretion. *Nature cell*  
436 *biology* 22: 297-309.
- 437 Zirin, J., Y. Hu, L. Liu, D. Yang-Zhou, R. Colbeth *et al.*, 2020 Large-Scale Transgenic *Drosophila* Resource  
438 Collections for Loss- and Gain-of-Function Studies. *Genetics* 214: 755-767.
- 439
